# Supplementary material for: A rapid conductometric sensor for the analysis of cyanide using imidazole based receptor
Source: Royal Society of Chemistry journal article supplement (doi:10.1039/c5cp03773e), 2015-01-01
Supplement: c5cp03773e1.pdf [file c5cp03773e1.pdf]

## Electronic Supplementary Information

# A rapid conductometric sensor for analysis of cyanide using imidazole based receptor

*Anirban Paul<sup>a,b</sup>, Mosarrat Perween<sup>a,b</sup>, Sukdeb Saha<sup>a,b</sup>, Divesh N. Srivastava<sup>a,b\*</sup>, Amitava Das<sup>a,b,c\*</sup>*

a Analytical Division and Centralized Instrument Facility, CSIR-Central Salt and Marine Chemicals  
Research Institute, Gijubhai Badheka Marg, Bhavnagar 364002, India.

b Academy of Scientific and Innovative Research-CSMCRI, Gijubhai Badheka Marg, Bhavnagar  
364002, India.

c Organic Chemistry Division, CSIR-National Chemical Laboratory, Dr. Homi Bhabha Road, Pune  
411008, India.

Fax: +91-0278-2567562; Tel: +91-278-2567760; E-mail: dnsrivastava@csmcri.org (D. N.  
Srivastava), a.das@ncl.res.in (A. Das).

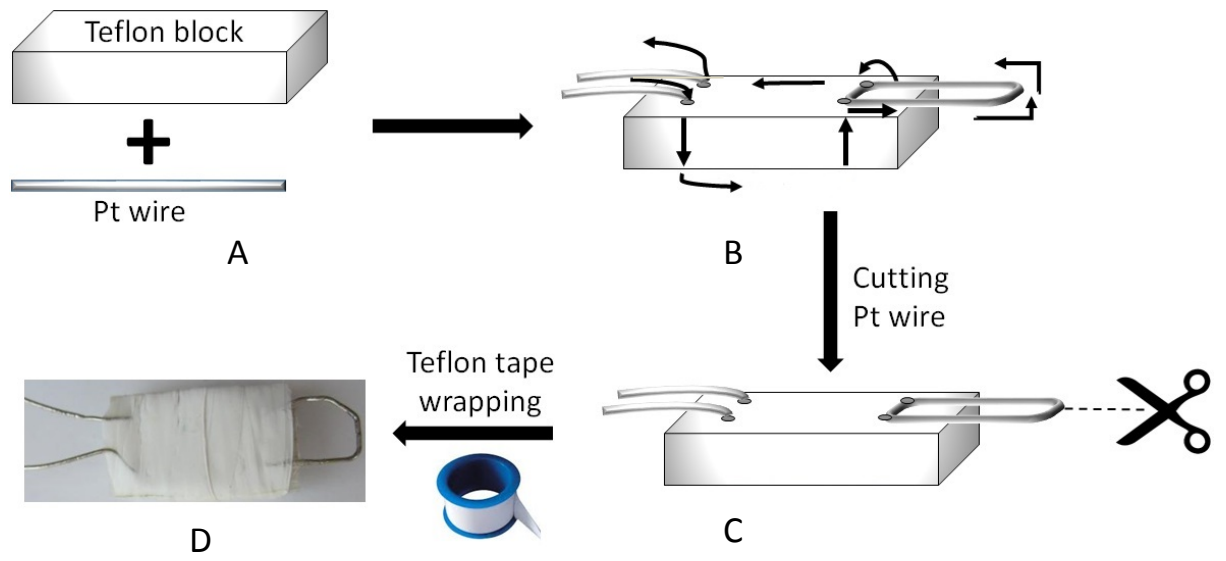

**Fig.**  
**S-1.**

Schematic diagram of the fabrication of the device for electropolymerization.  
D) Actual image of the device.

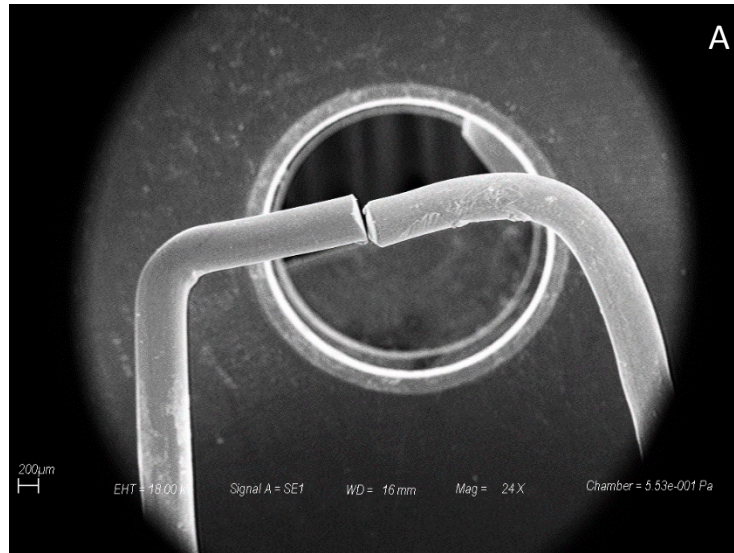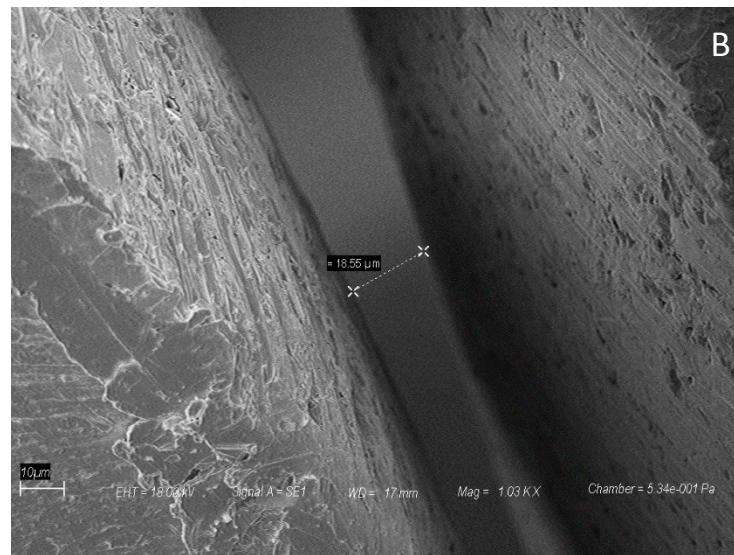

**Fig. S-2.** A) SEM image of the closed side of the device; B) Magnified view of the device showing the separation between two edges of platinum electrode.

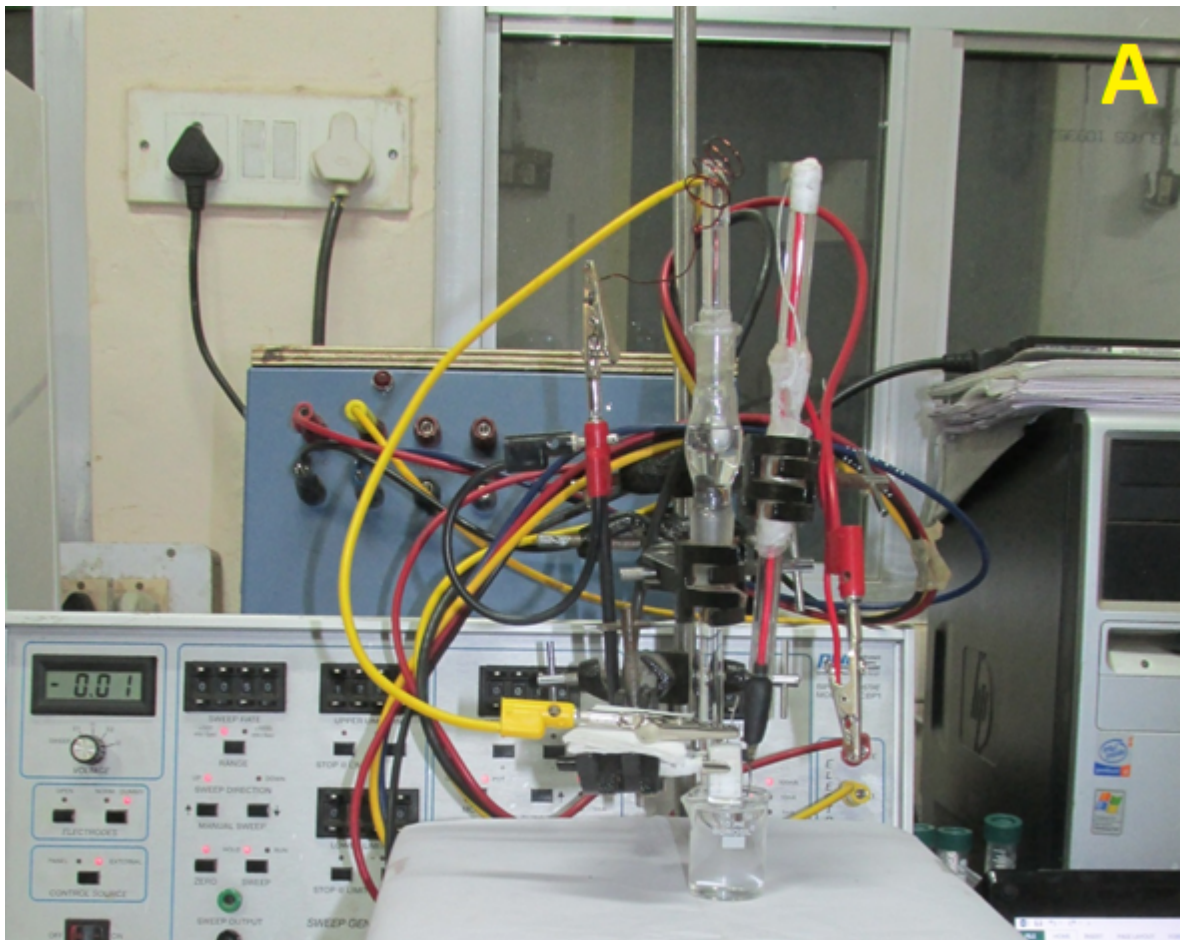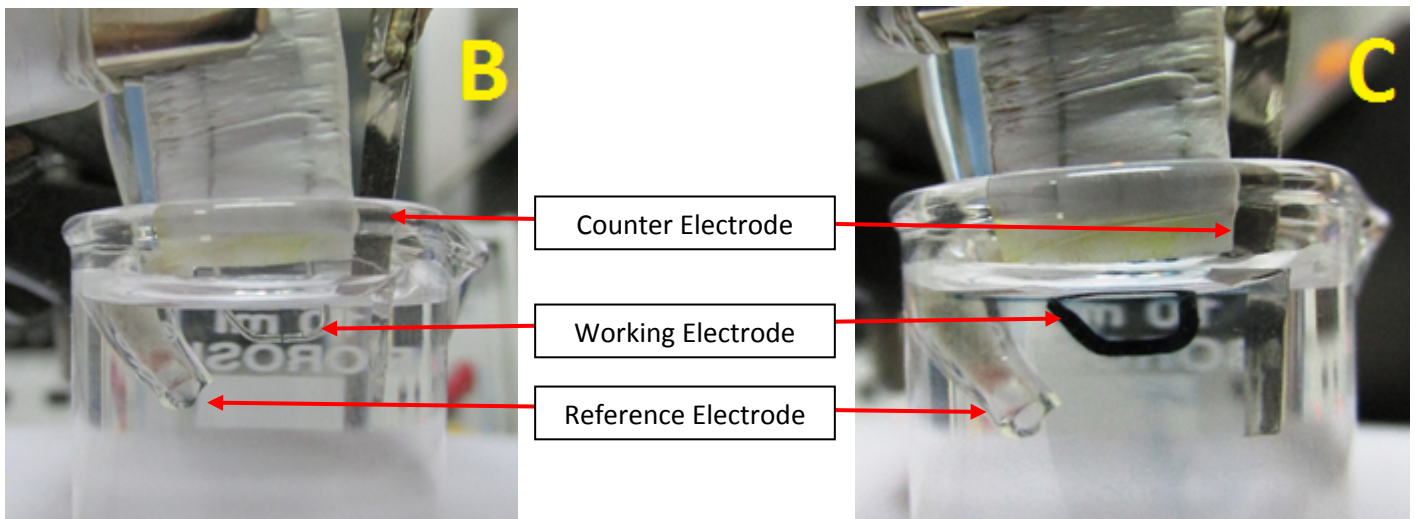

**Fig. S-3.** A) Photograph of complete experimental setup; Arrangement of counter, working and reference electrode B) before polymerization; C) after polymerization.

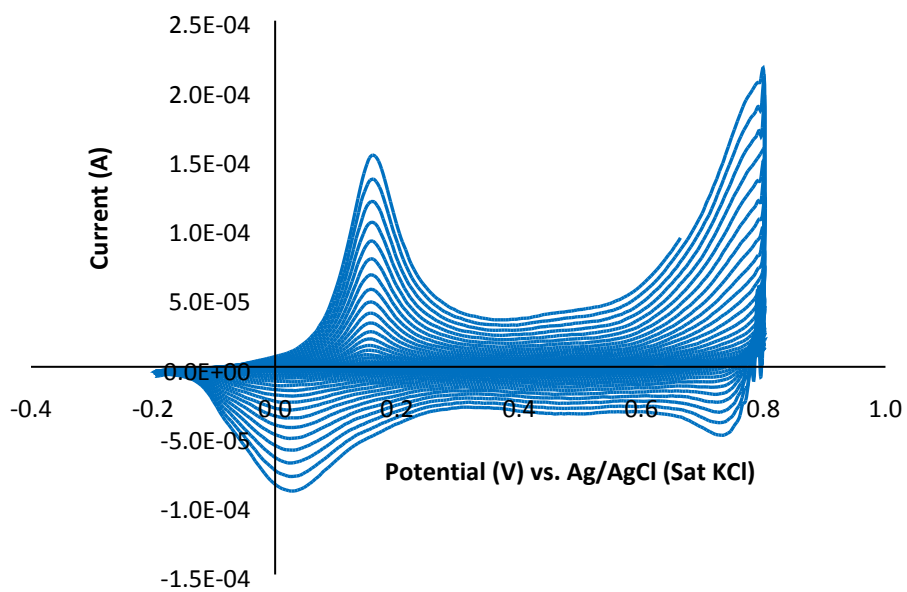

**Fig. S-4.** Cyclic voltammogram of aniline polymerization.

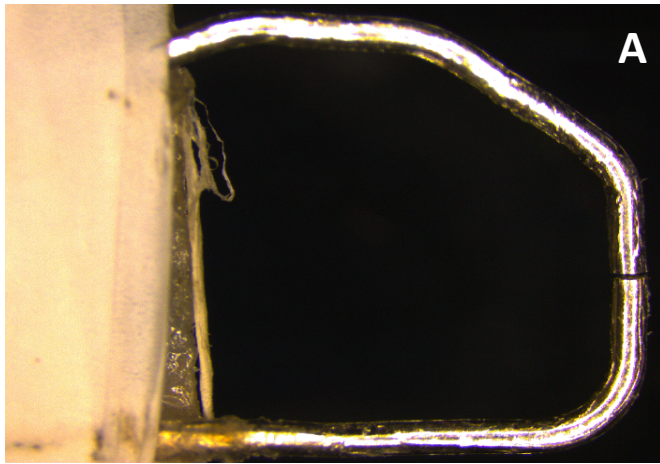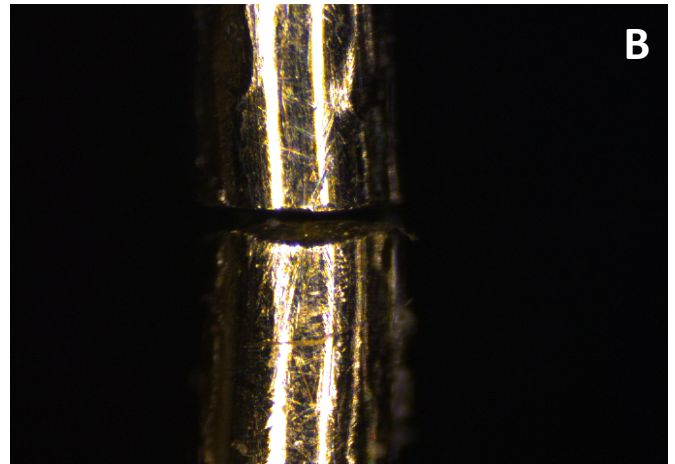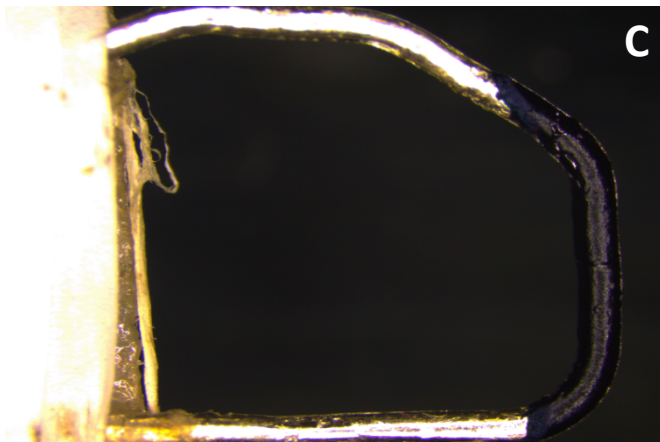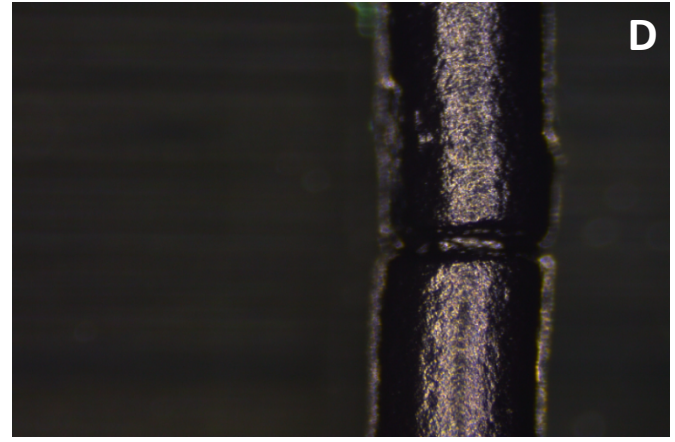

**Fig. S-5.** Photograph of the device before and after bridging of polyaniline A & B) Low and high magnified image before polymerization; C-D) Low and high magnified image after polymerization.

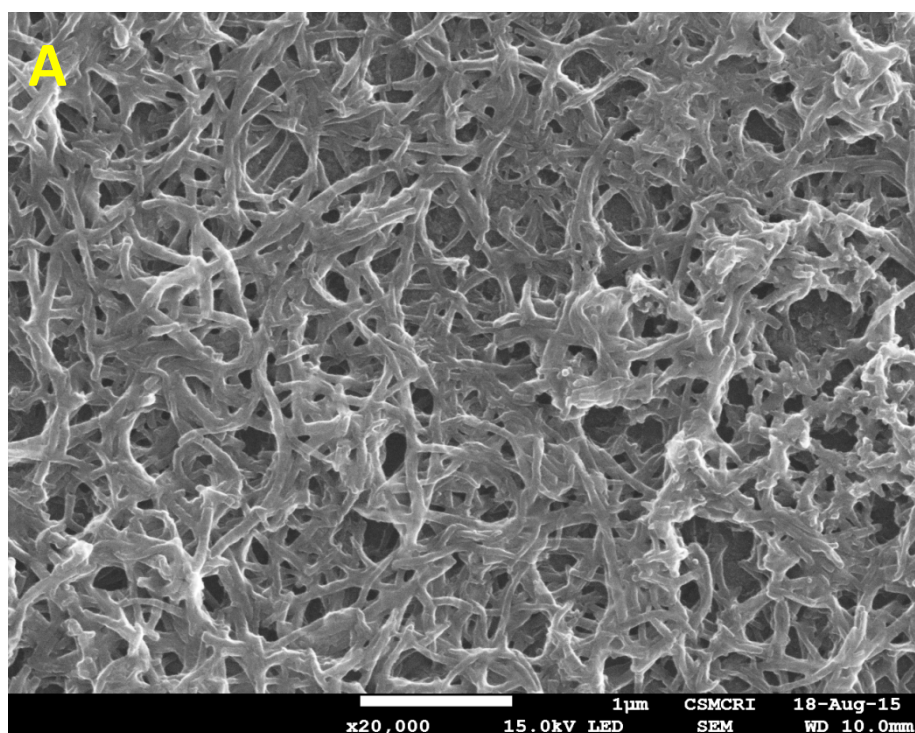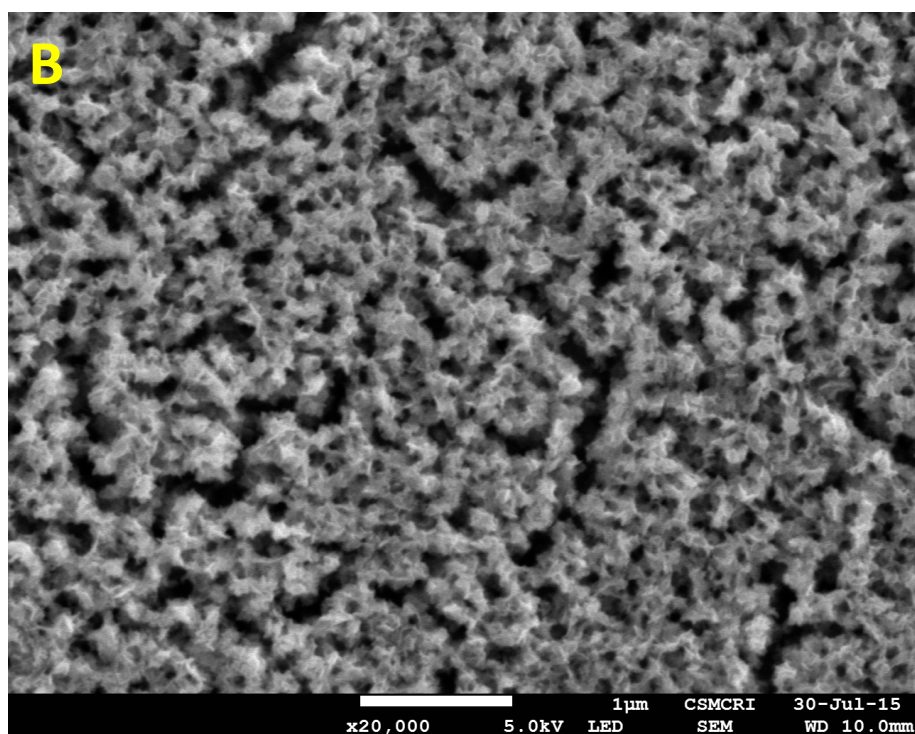

**Fig. S-6.** A) FE-SEM image of electrochemically polymerized polyaniline at -200 mV potential having close packed fibrous structure unsuitable for immobilization. B) FE- SEM image of the same at 400 mV potential having porous and open structure suitable for immobilization of analyte.



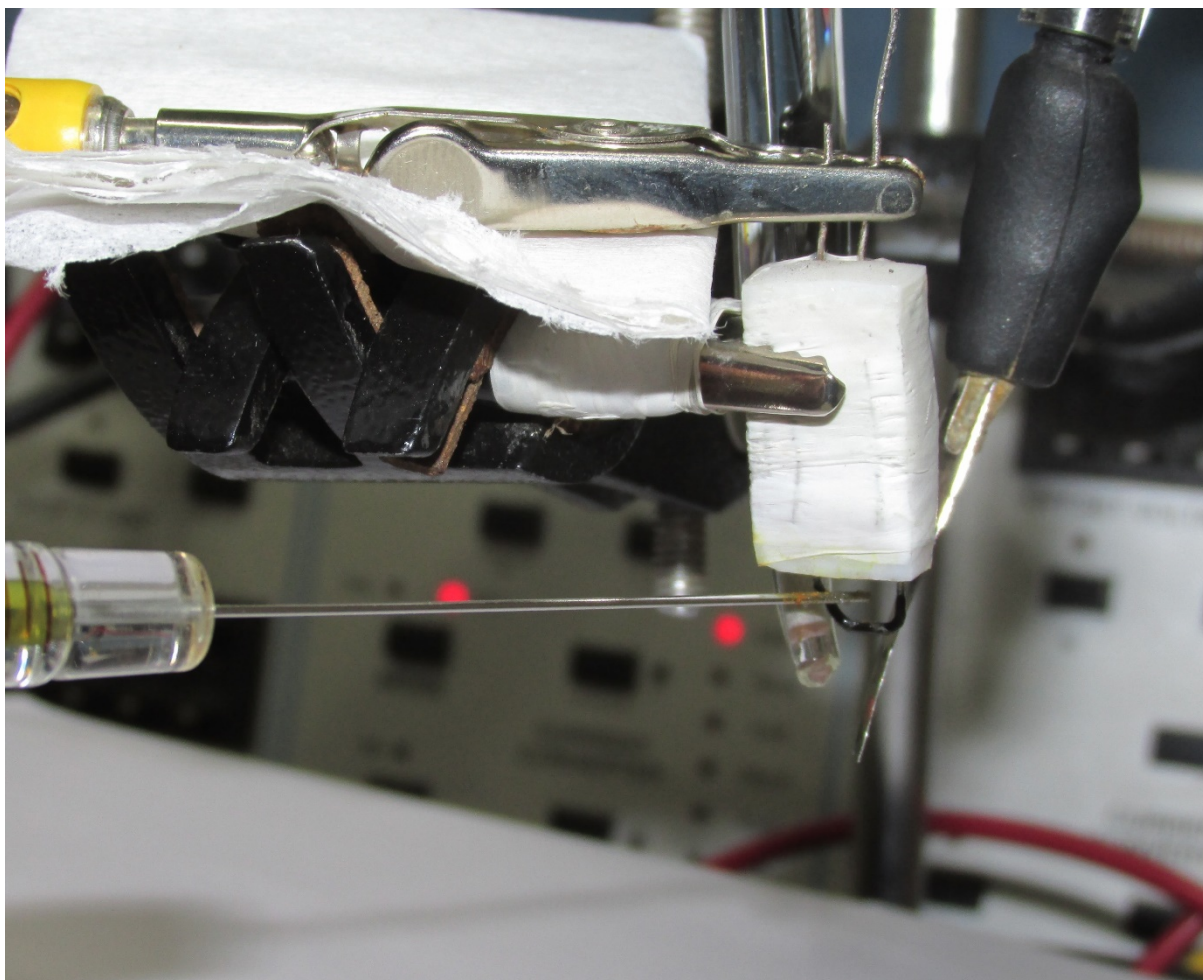

**Fig. S-7.** Photograph of the process of immobilization of receptor in the device.

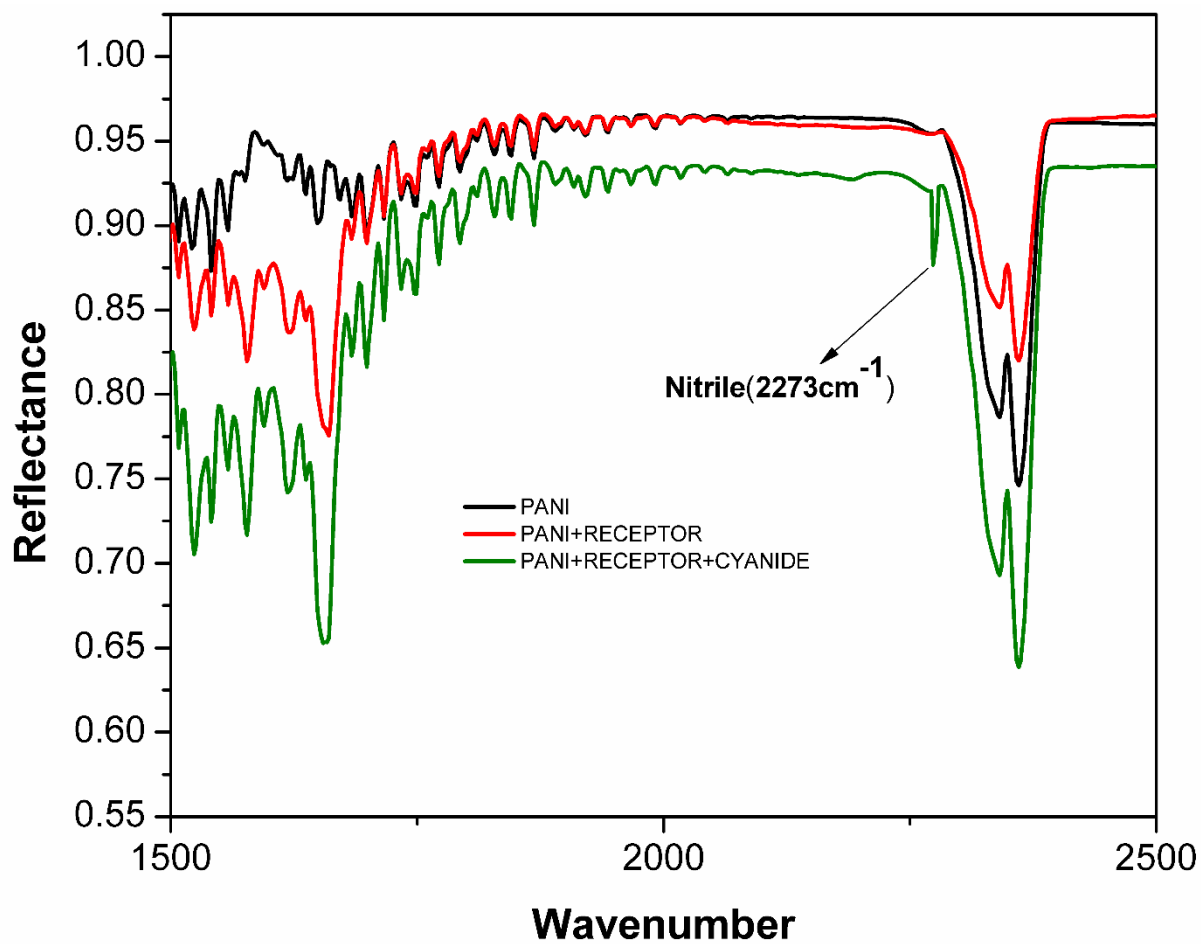

**Fig. S-8.** Comparative FT-IR spectra of polyaniline, binary mixture of polyaniline and receptor and tertiary mixture of polyaniline, receptor and cyanide.

**Table S-9.** List of selected cyanide sensors reported in literature with their MDL.

| <b>Method</b>      | <b>MDL<sup>#</sup> (mol/Lit)</b> | <b>Lin. Range (mol/Lit)</b> | <b>Ref.*</b> |
|--------------------|----------------------------------|-----------------------------|--------------|
| Amperometry        | $2 \times 10^{-5}$               | $< 1 \times 10^{-6}$        | 1            |
| SET                | $2 \times 10^{-5}$               | $< 16 \times 10^{-6}$       | 2            |
| Voltametry         | $1 \times 10^{-8}$               | $< 2 \times 10^{-6}$        | 4            |
| Chrono-amperometry | $2 \times 10^{-10}$              | $< 3 \times 10^{-12}$       | 6            |
| Colorimetry        | $2 \times 10^{-6}$               | $< 1 \times 10^{-4}$        | 8            |
| Colorimetry        | $8 \times 10^{-5}$               | $< 3 \times 10^{-7}$        | 10           |
| Fluorescent        | $8 \times 10^{-10}$              | $< 1 \times 10^{-3}$        | 12           |
| Amperometry        | $4 \times 10^{-4}$               | $< 3 \times 10^{-6}$        | 17           |
| Amperometry        | $4 \times 10^{-3}$               | $< 3 \times 10^{-5}$        | 22           |
| Amperometry        | $2 \times 10^{-6}$               | $< 8 \times 10^{-4}$        | 23           |

<sup>#</sup> MDL stands for minimum detection limit.

\* Please see list of publications in manuscript.

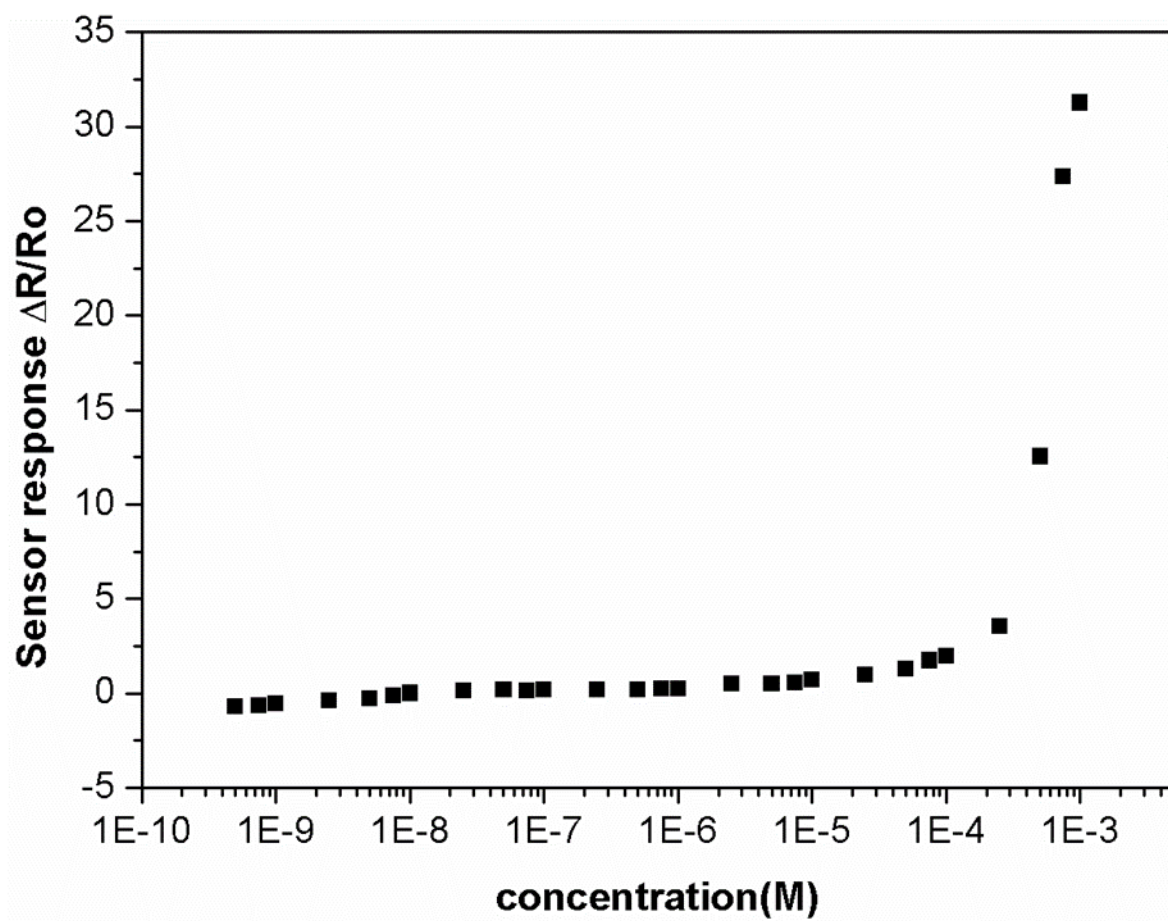

**Fig. S-10.** General plot of sensor response covering all the three segments as discussed in section 3.3 in main text.

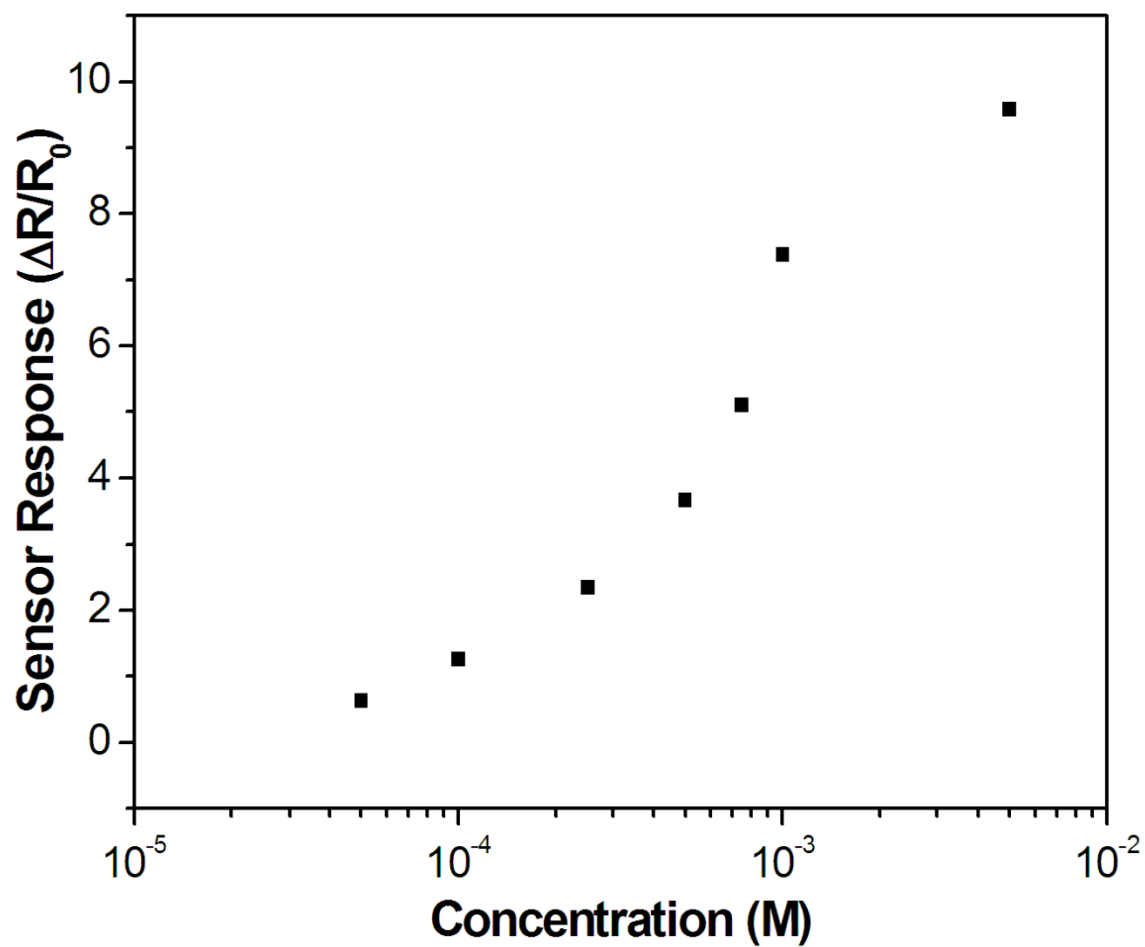

Fig. S-11. The sensor response without immobilization of receptor at 400 mV potential.

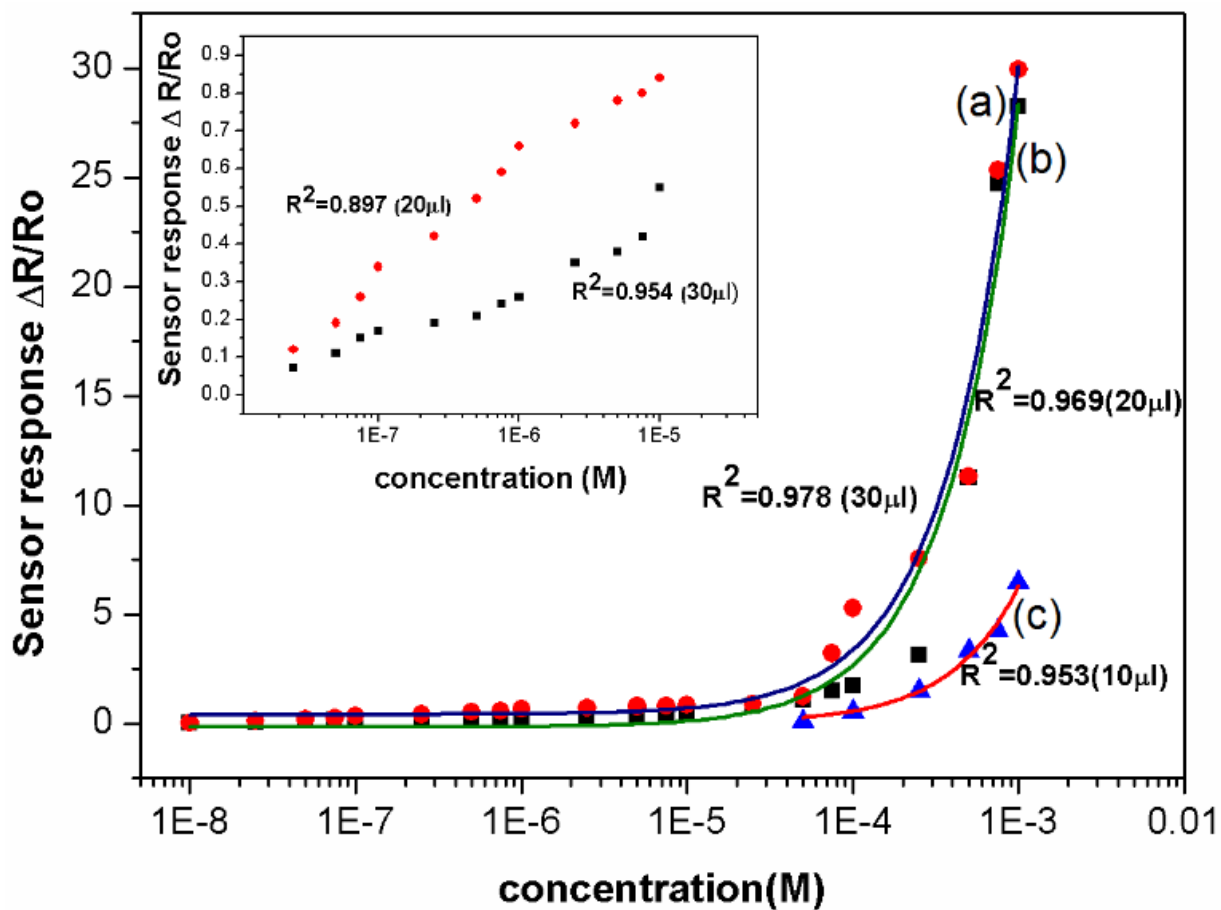

**Fig. S-12.** Effect of amount of receptor on sensor response (a) 30  $\mu\text{L}$  loading; (b) 20  $\mu\text{L}$  loading; (c) 10  $\mu\text{L}$  loading.

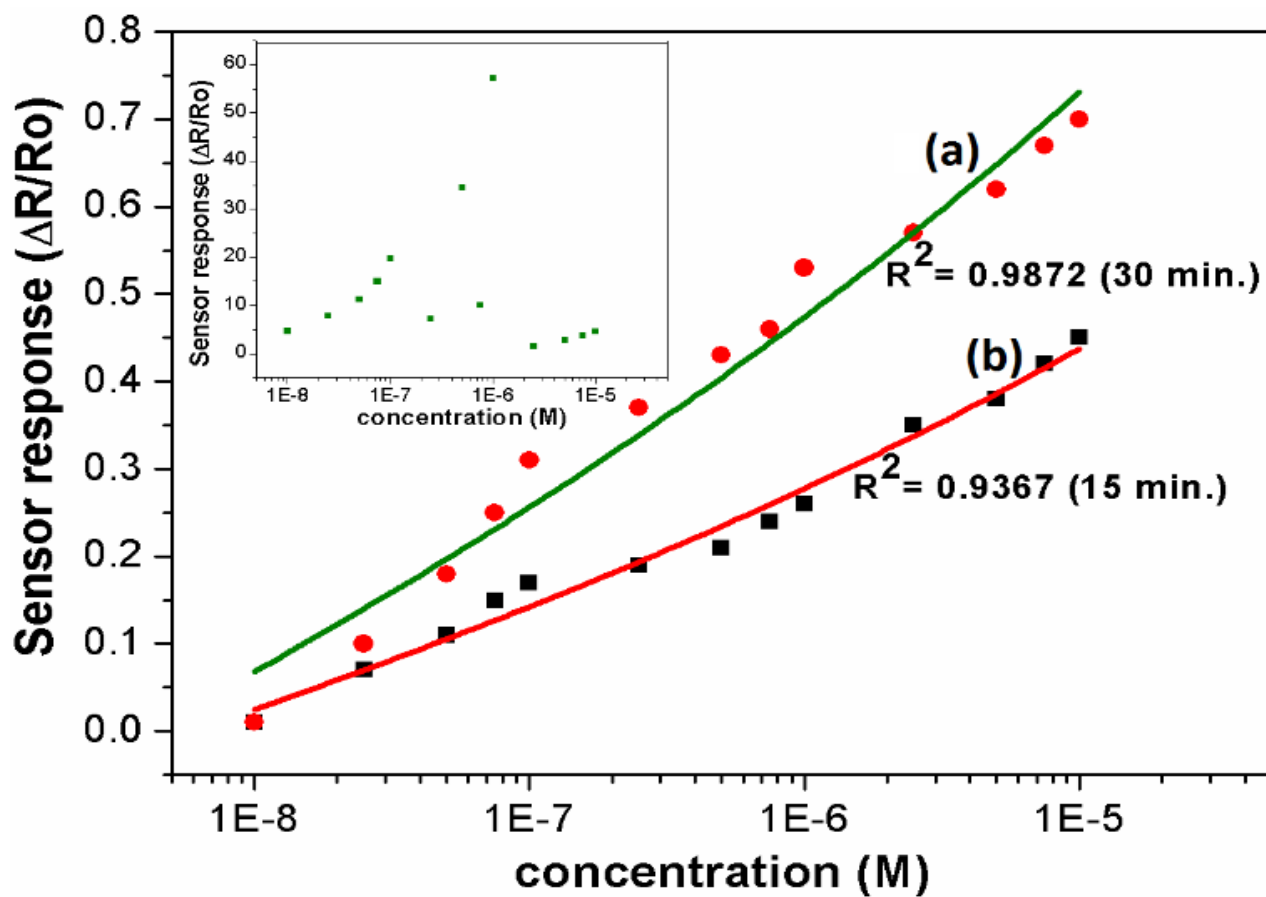

**Fig. S-13.** Effect of equilibration time on the sensor response (a) 30 minutes; (b) 15 minutes. [*In-set:* Sensor response recorded with 5 minutes response time in segment two].

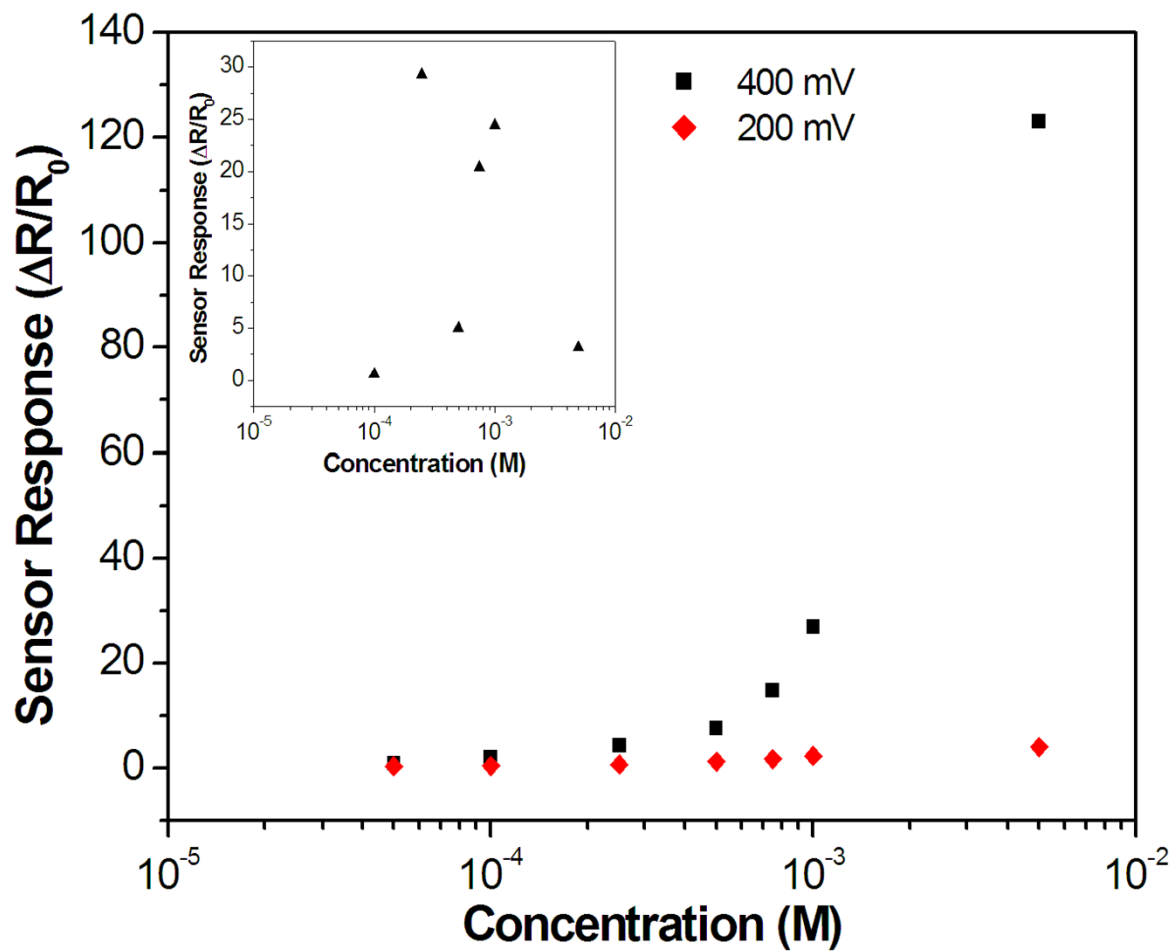

**Fig. S-14.** The sensor response as a function of electrochemical states vs. Ag/AgCl; A) at +400 mV; B) at +200 mV [Inset: sensor response at -200 mV].



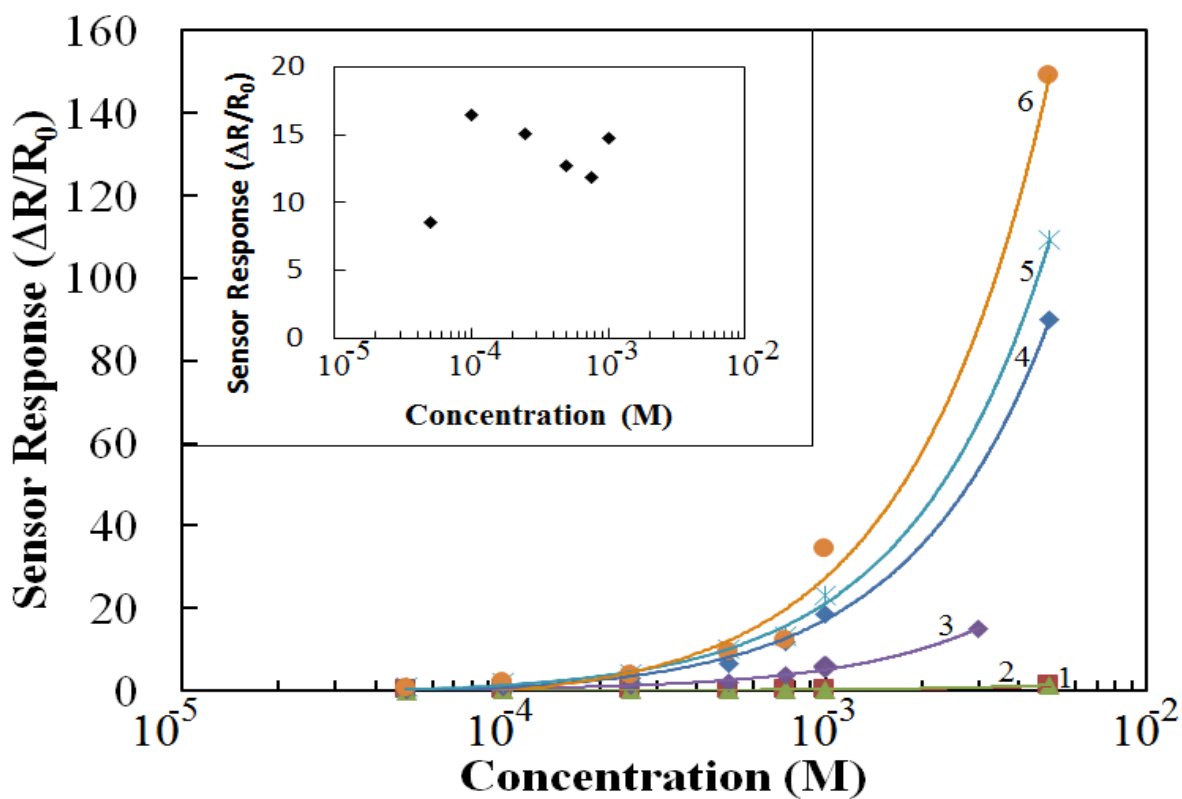

**Fig. S-15.** Effect of pH on sensor response; (1) pH= 1, (2) pH= 2, (3) pH =3, (4) pH=4, (5) pH=5 & (6) pH=6. (*In-set*: sensor response at pH=9).

**Table S-16.** Solvation enthalpy of anions.

| Anion                         | $-\Delta H_{\text{hyd}}^0$ (kJ/mol) |
|-------------------------------|-------------------------------------|
| F <sup>-</sup>                | 515                                 |
| Cl <sup>-</sup>               | 381                                 |
| I <sup>-</sup>                | 307                                 |
| NO <sub>2</sub> <sup>-</sup>  | 405                                 |
| NO <sub>3</sub> <sup>-</sup>  | 314                                 |
| SO <sub>4</sub> <sup>2-</sup> | 1495                                |
| CO <sub>3</sub> <sup>2-</sup> | 1314                                |
| CN <sup>-</sup>               | 68                                  |

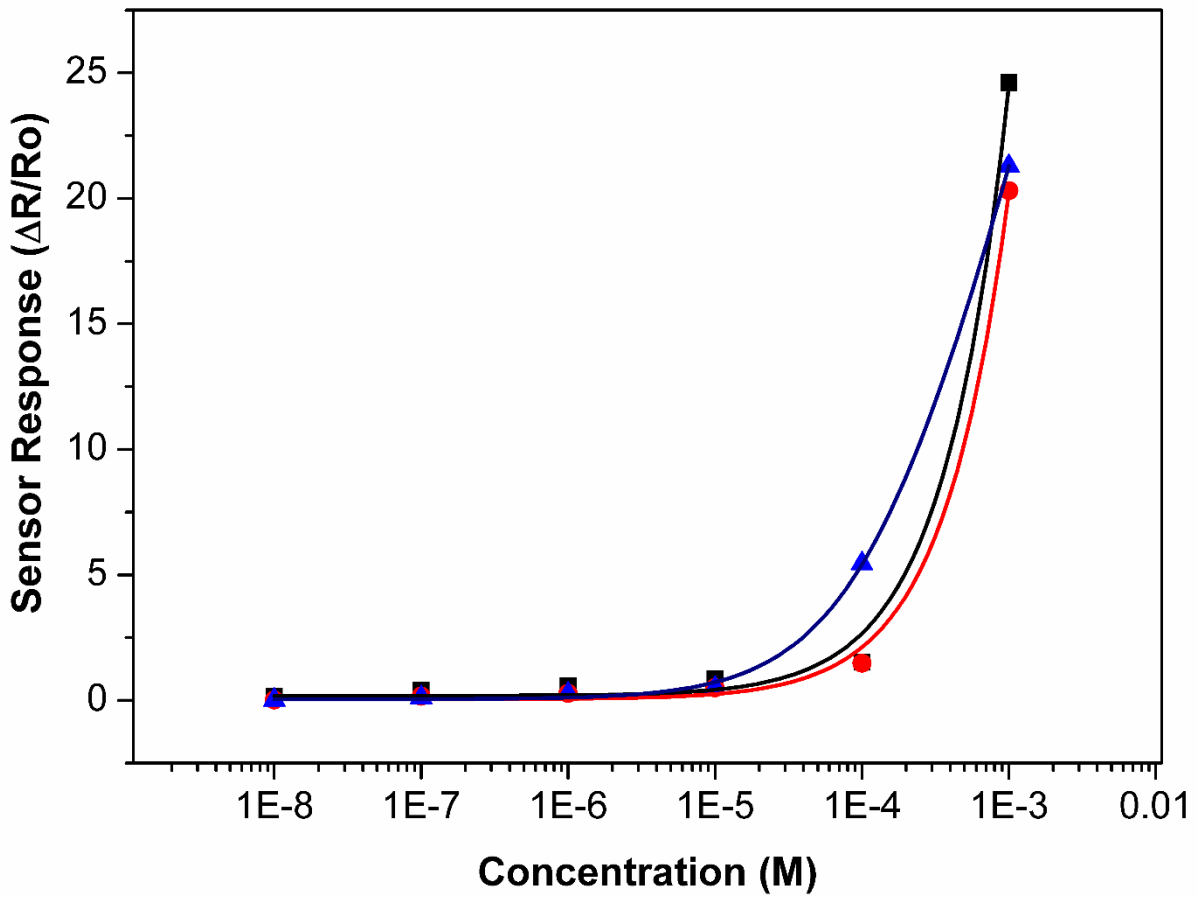

**Fig. S-17:** Three repeated sensor responses after transfusion of cyanide in wastewater taken from river Garga, Jharkhand in India.
